# Supplementary material
Source: publisher site journal article supplement (https://www.dovepress.com/article/318576)
Supplement: Supplementary file 1 [file get_supplementary_file.php]

**Supplement 1. R code used in multivariate hierarchical generalized linear model**

library(mdhglm)

## data loading ##

naproxen<-read.csv("Naproxen.csv")

naproxen$ln_Cmax=log(naproxen$Cmax)

naproxen$ln_AUC=log(naproxen$AUClast)

## initial model setting ##

jm1<-DHGLMMODELING(Link="identity", LinPred=ln_Cmax~PRD+SEQ+TRT_code+(1|ID),RandDist="gaussian")

jm2<-DHGLMMODELING(Link="identity", LinPred=ln_AUC~PRD+SEQ+TRT_code+(1|ID),RandDist="gaussian")

Init_Corr=list(c(0))

SSC=list(as.factor(c(naproxen$ID,naproxen$ID)),as.factor(c(naproxen$ID,naproxen$ID)))

EstimateOverDisp=c(TRUE,TRUE)

LaplaceFixed=c(TRUE,TRUE)

ZZ1<-model.matrix(~as.factor(naproxen$ID)-1)

ZZCorr=list(ZZ1,ZZ1)

#### separate two LMMs ####

res_ind<-jointfit(RespDist=c("gaussian","gaussian"),DataMain=list(naproxen,naproxen),

MeanModel=list(jm1,jm2),structure="correlated",

Init_Corr=Init_Corr,EstimateCorrelations=FALSE)

betas_ind<-data.frame(estimate=res_ind$Beta,stderr=res_ind$StdErrBeta,

z_value=res_ind$Beta/res_ind$StdErrBeta)

rownames(betas_ind)<-c("Cmax:Intercept","Cmax:prd","Cmax:seq","Cmax:trt",

"AUClast:Intercept","AUClast:prd","AUClast:seq","AUClast:trt")

betas_ind

Cmax_CI_ind<-exp(c(betas_ind[4,1],betas_ind[4,1]-qnorm(0.95)*betas_ind[4,2],betas_ind[4,1]+qnorm(0.95)*betas_ind[4,2]))

AUC_CI_ind<-exp(c(betas_ind[8,1],betas_ind[8,1]-qnorm(0.95)*betas_ind[8,2],betas_ind[8,1]+qnorm(0.95)*betas_ind[8,2]))

rbind(Cmax_CI_ind,AUC_CI_ind)

###binariate HGLMs###

res_cor<-jointfit(RespDist=c("gaussian","gaussian"),DataMain=list(naproxen,naproxen),

MeanModel=list(jm1,jm2),structure="correlated",

Init_Corr=Init_Corr,EstimateCorrelations=TRUE)

betas_cor<-data.frame(estimate=res_cor$Beta,stderr=res_cor$StdErrBeta,

z_value=res_cor$Beta/res_cor$StdErrBeta)

rownames(betas_cor)<-c("Cmax:Intercept","Cmax:prd","Cmax:seq","Cmax:trt",

"AUClast:Intercept","AUClast:prd","AUClast:seq","AUClast:trt")

betas_cor

c(res_cor$Correlations,res_cor$StdErrCorr)

Cmax_CI_cor<-exp(c(betas_cor[4,1],betas_cor[4,1]-qnorm(0.95)*betas_cor[4,2],betas_cor[4,1]+qnorm(0.95)*betas_cor[4,2]))

AUC_CI_cor<-exp(c(betas_cor[8,1],betas_cor[8,1]-qnorm(0.95)*betas_cor[8,2],betas_cor[8,1]+qnorm(0.95)*betas_cor[8,2]))

rbind(Cmax_CI_cor,AUC_CI_cor)

**Supplement 2. Supplementary figures.**


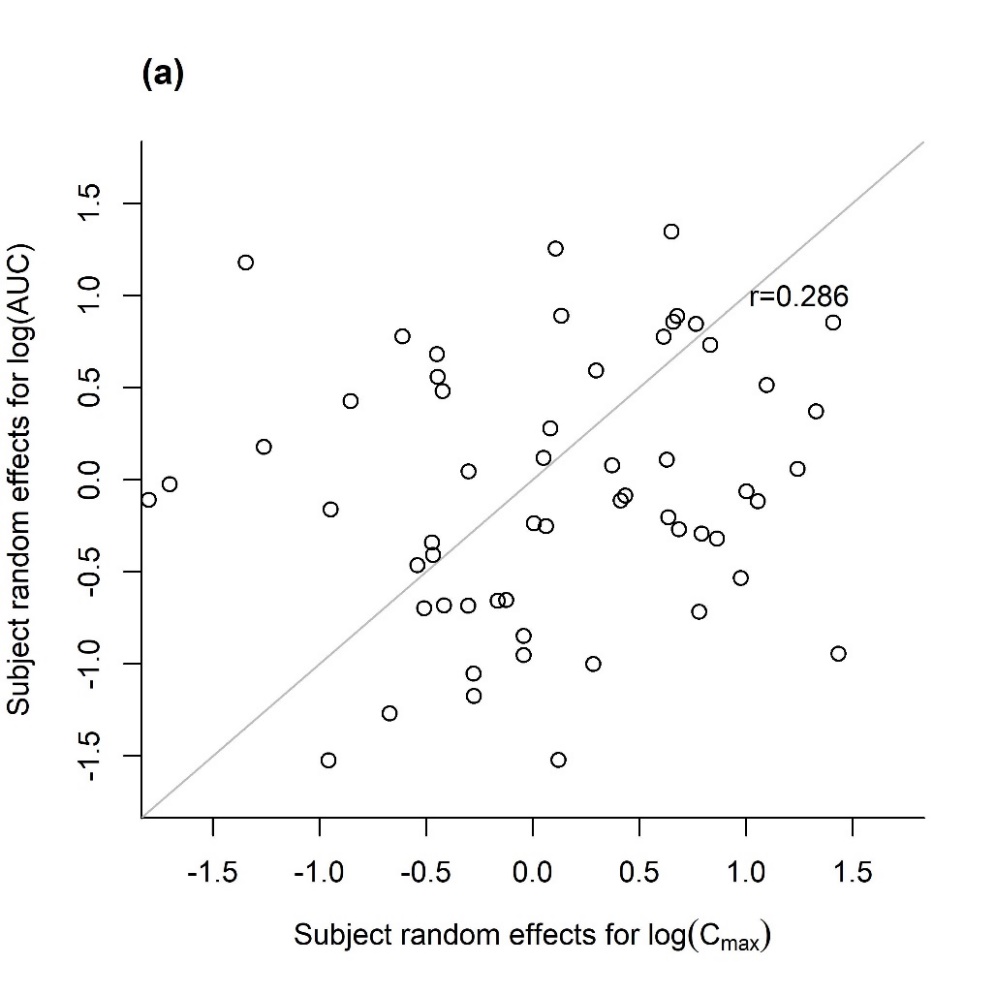

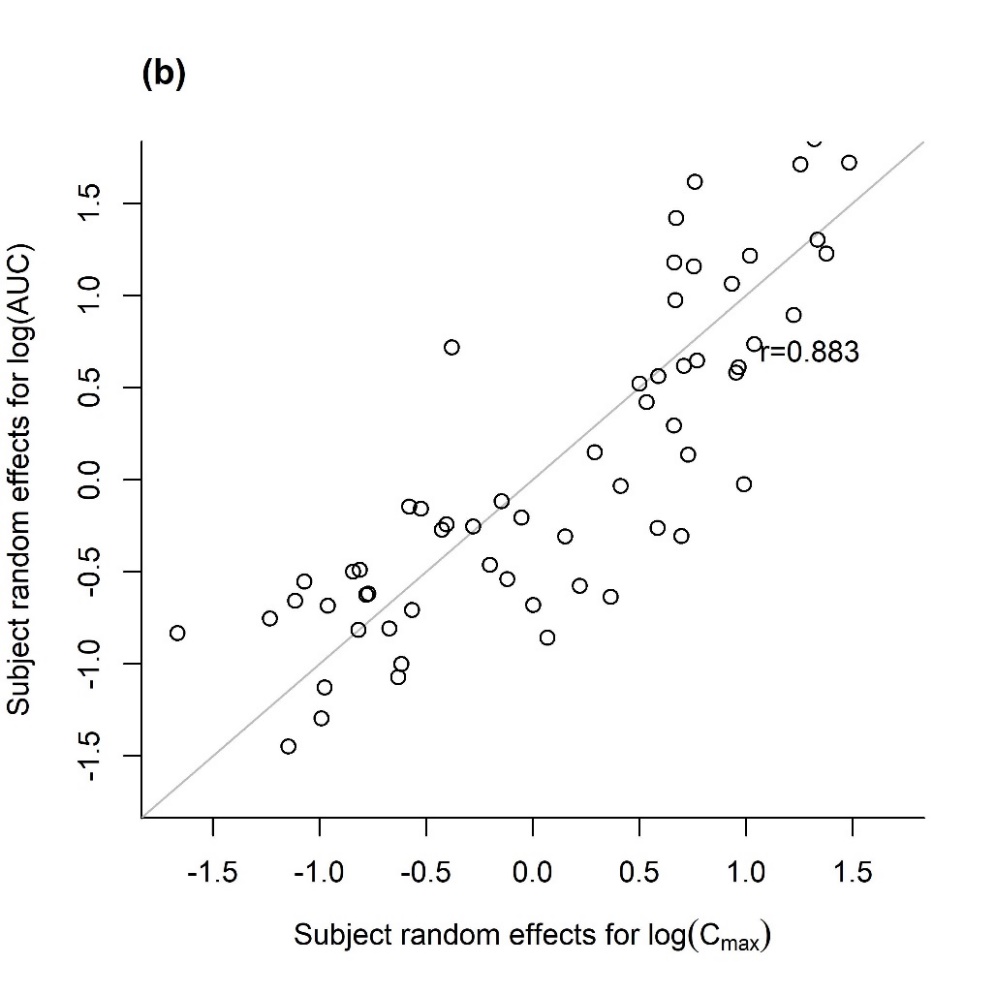

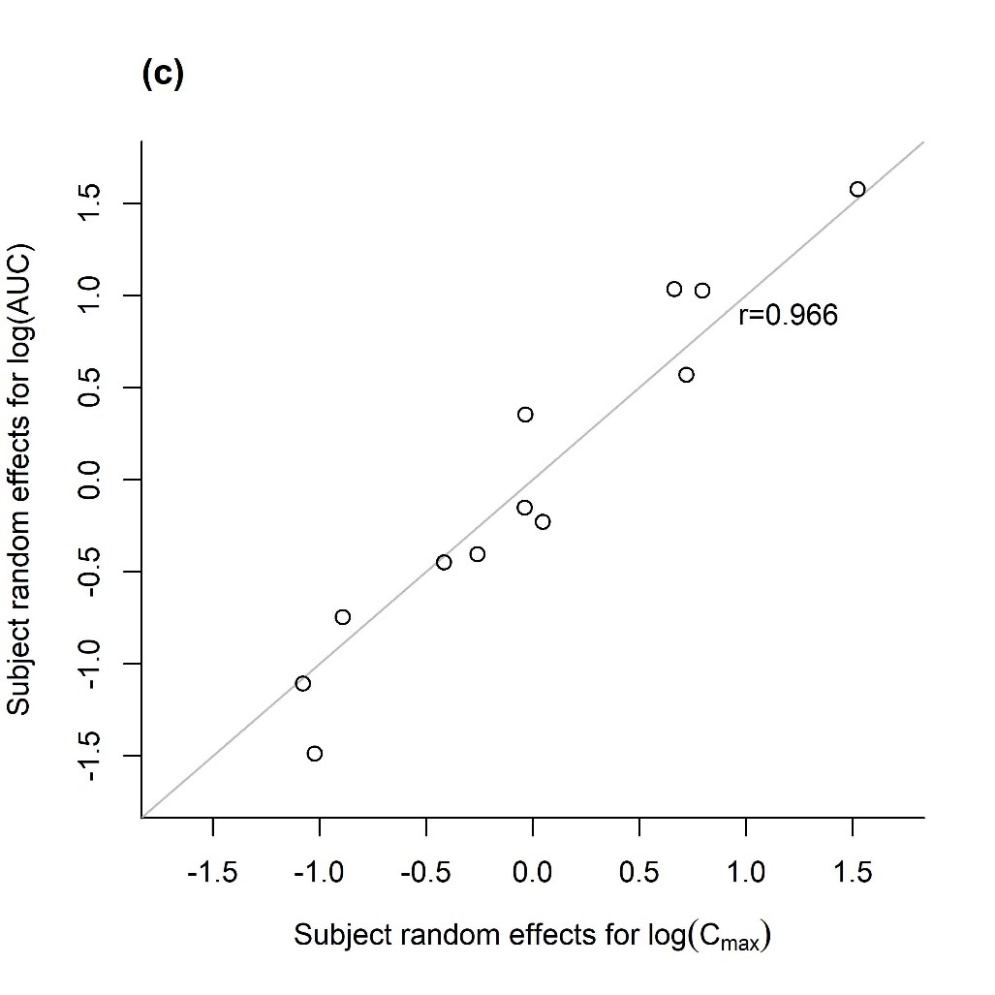

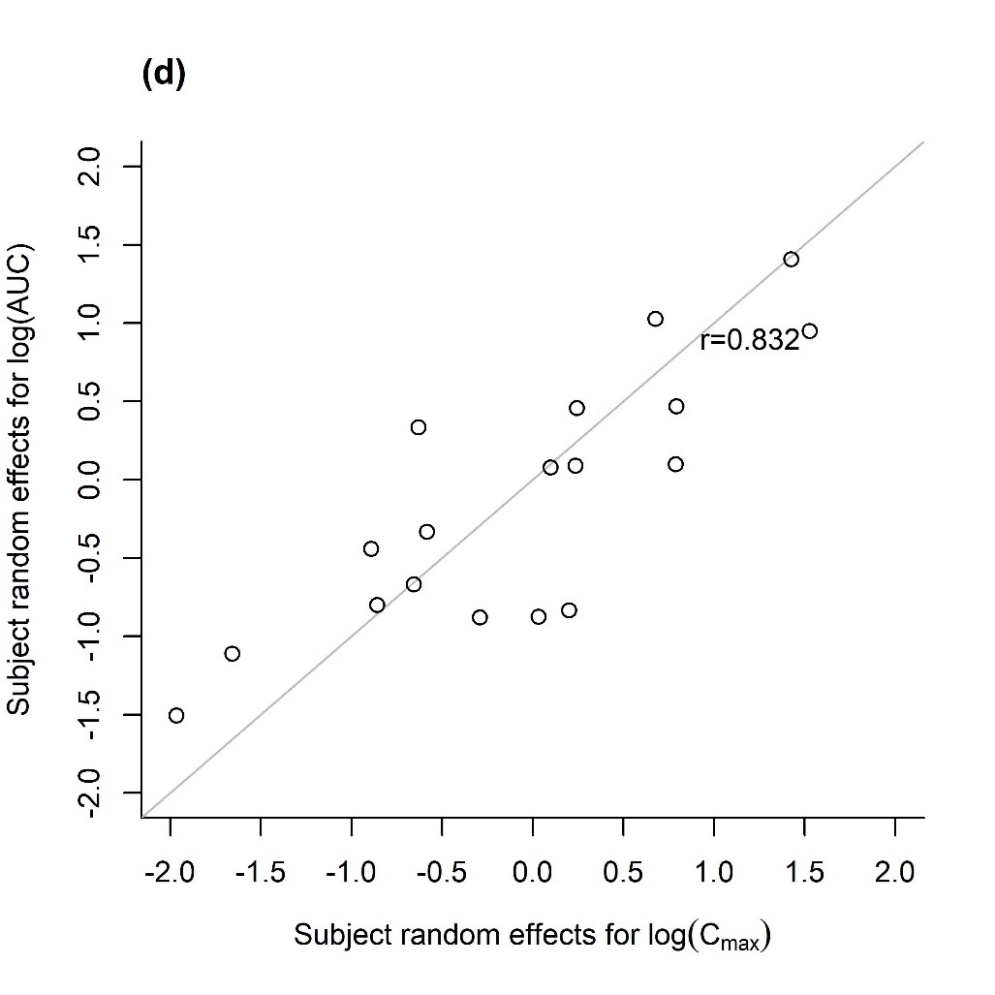


Figure S1.(a) Scatter plots of separately predicted subject random effects for log(Cmax) and log(AUC) of naproxen in the fixed-dose combination data using the linear mixed model (1) and their correlation coefficients ; (b) of esomeprazole in the fixed-dose combination data using the linear mixed model (1) ; (c) of tramadol using the linear mixed model (1); (d) of fimasartan using the linear mixed model (1) without period and sequence effects.
